# Supplementary material for: hHGF Overexpression in Myoblast Sheets Enhances Their Angiogenic Potential in Rat Chronic Heart Failure
Source: PLoS One. 2011 Apr 26;6(4):e19161. doi: 10.1371/journal.pone.0019161 (PMC3082550; doi:10.1371/journal.pone.0019161)
Supplement: Table S2 — Gene ontology (GO) categories. GO groups significantly associated with the differentially expressed genes in L6-HGF myoblasts as compared to L6-WT myoblasts. (XLSX) [file pone.0019161.s004.xlsx]

## Sheet: Sheet1
GO ID	GO ACCESSION	GO Term	corrected p-value
3394	GO:0005576	extracellular region	0.0000118183
18812	GO:0044421	extracellular region part	0.0002883109
3617	GO:0005865	striated muscle thin filament	0.0010408716
22125	GO:0048513	organ development	0.0016071054
22337	GO:0048731	system development	0.0034741145
11968	GO:0030016	myofibril	0.0048324303
1963	GO:0003012	muscle system process	0.005816925
14319	GO:0032501	multicellular organismal process	0.005816925
18121	GO:0043292	contractile fiber	0.005816925
11969	GO:0030017	sarcomere	0.009919963
22457	GO:0048856	anatomical structure development	0.009919963
3614	GO:0005861	troponin complex	0.012267637
4523	GO:0006941	striated muscle contraction	0.012267637
6431	GO:0009611	response to wounding	0.012267637
18840	GO:0044449	contractile fiber part	0.012885103
4795	GO:0007275	multicellular organismal development	0.017801853
6685	GO:0009887	organ morphogenesis	0.019315228
4519	GO:0006936	muscle contraction	0.01936385
23421	GO:0050896	response to stimulus	0.020421982
6425	GO:0009605	response to external stimulus	0.020977791
14788	GO:0032972	regulation of muscle filament sliding speed	0.020977791
6464	GO:0009653	anatomical structure morphogenesis	0.02182426
3430	GO:0005615	extracellular space	0.024060145
795	GO:0001657	ureteric bud development	0.031756658
12078	GO:0030154	cell differentiation	0.03211453
8183	GO:0015629	actin cytoskeleton	0.035968196
12372	GO:0030514	negative regulation of BMP signaling pathway	0.04076837
14787	GO:0032971	regulation of muscle filament sliding	0.048936915
